# Distinct Tumor Necrosis Factor Alpha Receptors Dictate Stem Cell Fitness Versus Lineage Output in *Dnmt3a*-Mutant Clonal Hematopoiesis

## Authors and Affiliations:

Jennifer M. SanMiguel<sup>1</sup>, Elizabeth Eudy<sup>1</sup>, Matthew A. Loberg<sup>1</sup>, Kira A. Young<sup>1</sup>, Jayna J. Mistry<sup>1</sup>, Logan S. Schwartz<sup>1</sup>, Tim Stearns<sup>1</sup>, Grant A. Challen<sup>2</sup>, Jennifer J. Trowbridge<sup>1\*</sup>

<sup>1</sup>The Jackson Laboratory, Bar Harbor, Maine

<sup>2</sup>Division of Oncology, Department of Medicine, Washington University School of Medicine, St. Louis, Missouri

## Running Title:

TNF Uncouples Stem Cell Fitness from Lineage Output in CHIP

## Keywords:

Clonal Hematopoiesis, TNF, HSC, *Dnmt3a*, Aging

## Additional Information:

- This work was supported by NIH U01AG077925 (J.J.T.), NIH R01DK118072 (J.J.T.), NIH R01AG069010 (J.J.T.), and an EvansMDS Discovery Research grant (J.J.T.). This study was supported in part by The Jackson Laboratory's Cancer Center Support Grant NIH P30 CA034196. J.M.S. was supported by NIH T32AG062409, NIH T32HD007065, and an American Society of Hematology (ASH) Scholar award. G.A.C. and J.J.T. are scholars of the Leukemia and Lymphoma Society. G.A.C. was supported by NIH R01 DK124883.
- \*Corresponding author. Jennifer J. Trowbridge, Ph.D., 600 Main Street, Bar Harbor, ME 04609, Phone: 207-288-6183, Email: [jennifer.trowbridge@jax.org](mailto:jennifer.trowbridge@jax.org)
- Conflict of interest disclosure: J.J.T. holds a sponsored research project with H3 Biomedicine. All other authors declare that they have no competing interests.
- Word count: 4,336 (incl. references), Figures: 4, References: 33

1 **Abstract:**

2 Clonal hematopoiesis resulting from enhanced fitness of mutant hematopoietic stem cells (HSCs)  
3 associates with both favorable and unfavorable health outcomes related to the types of mature mutant  
4 blood cells produced, but how this lineage output is regulated is unclear. Using a mouse model of a  
5 clonal hematopoiesis-associated mutation, *DNMT3A*<sup>R882/+</sup> (*Dnmt3a*<sup>R878H/+</sup>), we found that aging-induced  
6 TNF $\alpha$  signaling promoted the selective advantage of mutant HSCs as well as stimulated mutant B  
7 lymphoid cell production. Genetic loss of TNF $\alpha$  receptor TNFR1 impaired mutant HSC fitness without  
8 altering lineage output, while loss of TNFR2 reduced lymphoid cell production and favored myeloid cell  
9 production from mutant HSCs without altering overall fitness. These results support a model where  
10 clone size and mature blood lineage production can be independently controlled to harness potential  
11 beneficial aspects of clonal hematopoiesis.

12

13 **Statement of Significance:**

14 Through identification and dissection of TNF $\alpha$  signaling as a key driver of murine *Dnmt3a*-mutant  
15 hematopoiesis, we report the discovery that clone size and production of specific mature blood cell types  
16 can be independently regulated.

17

18

19 **Introduction:**

20 Clonal hematopoiesis is an aging-associated condition wherein hematopoietic stem cells (HSCs) have  
21 acquired a somatic mutation or copy number alteration that places them at a selective advantage. Both  
22 favorable and unfavorable health conditions have been associated with clonal hematopoiesis. Large  
23 clone size (VAF > 0.02) is associated with increased risk of hematologic malignancy, atherosclerosis,  
24 cardiovascular disease, type 2 diabetes, and osteoporosis<sup>1-3</sup>. Many of these conditions have been related  
25 to abnormal production of pro-inflammatory myeloid cell types such as macrophages and mast cells<sup>4-7</sup>.  
26 However, clonal hematopoiesis is naturally found in very aged populations without compromising  
27 survival<sup>8</sup> and is associated with reduced risk of Alzheimer's disease<sup>9</sup>. Furthermore, clonal hematopoiesis  
28 driven by mutations in the DNA methyltransferase *DNMT3A* has been associated with increased  
29 survival of recipients after bone marrow transplantation related to mutant T lymphoid cell production<sup>10</sup>  
30 and maintenance of functional T cell immunity in a supercentenarian<sup>11</sup>. Thus, rather than developing  
31 methods to reduce clonal hematopoiesis altogether, further understanding of the molecular basis of both  
32 clone size and lineage potential will empower strategies to harness beneficial aspects of clonal  
33 hematopoiesis while reducing adverse health risks. Here, we used a mouse model of a clonal  
34 hematopoiesis-associated mutation in *DNMT3A* (*Dnmt3a*<sup>R878H/+</sup>)<sup>12</sup> to study the molecular basis of HSC  
35 competition and lineage output.

36

37 **Results:**

38 Our group recently found that the middle-aged bone marrow (BM) microenvironment drives HSC  
39 aging<sup>13</sup>. This work established an experimental paradigm to evaluate potency of *Dnmt3a*<sup>R878H/+</sup> HSCs in  
40 the aged BM microenvironment and identify HSC-extrinsic factors that modulate their selective  
41 advantage. We transplanted *Dnmt3a*<sup>R878H/+</sup> HSCs into young and middle-aged recipient mice (Fig. 1A).  
42 *Dnmt3a*<sup>R878H/+</sup> HSCs transplanted into aged recipients generated greater long-term multilineage  
43 hematopoiesis compared to control HSCs (Fig. 1B-C and Supplementary Fig. 1A) and gave rise to  
44 expanded HSC and multipotent progenitor (MPP) populations (Fig. 1D-E and Supplementary Fig. 1B).  
45 In addition, aged recipients had higher proportions of *Dnmt3a*<sup>R878H/+</sup> megakaryocyte and erythroid-  
46 primed MPPs (MPP<sup>Mk/E</sup>) and lymphoid-primed MPPs (MPP<sup>Ly</sup>) (Fig. 1E). The latter was consistent with  
47 increased mature *Dnmt3a*<sup>R878H/+</sup> B lymphoid cells (Supplementary Fig. 1A). No change in frequency of  
48 mature T lymphoid cells was observed, which may be explained in part by thymic involution during  
49 aging<sup>14</sup>. Control mice did not show significant MPP<sup>Ly</sup> increase nor consistently higher mature B  
50 lymphoid cell production (Fig. 1E and Supplementary Fig. 1A-B). Together, these results demonstrate

51 that the aged BM microenvironment provides a context in which *Dnmt3a*<sup>R878H/+</sup> HSCs have enhanced  
52 selective advantage over wild-type HSCs as well as altered lineage output.

53

54 To identify molecular signatures underlying expanded *Dnmt3a*<sup>R878H/+</sup> hematopoiesis in the aged BM  
55 microenvironment, we performed RNA-seq on independent biological replicates of HSCs re-isolated  
56 from young and aged recipient mice. Our experimental design specified only a sublethal dose of  
57 irradiation to recipient mice, to better preserve HSC-extrinsic signals from the BM microenvironment<sup>15-</sup>  
58 <sup>19</sup> (Supplementary Fig. 1C). A greater number of differentially expressed genes in *Dnmt3a*<sup>R878H/+</sup> vs.  
59 control HSCs were found in aged compared to young recipient mice (Fig. 1F). Using gene and pathway  
60 enrichment analyses, TNF $\alpha$  was identified as the top enriched gene signature and predicted upstream  
61 regulator in *Dnmt3a*<sup>R878H/+</sup> HSCs in aged mice (Fig. 1G). A previously described TNF $\alpha$ -induced  
62 transcriptional program in HSCs, enriched in pro-survival genes<sup>20</sup>, was elicited in *Dnmt3a*<sup>R878H/+</sup> HSCs in  
63 aged mice (Supplementary Fig. 1D). In addition, *Dnmt3a*<sup>R878H/+</sup> HSCs in aged mice maintained  
64 expression of transcriptional programs that define mouse and human HSCs<sup>21,22</sup> (Supplementary Fig. 1D).  
65 Consistent with these observations, human *DNMT3A*<sup>R882H/+</sup> CD34<sup>+</sup> HSPCs showed enrichment of a  
66 TNF $\alpha$  pathway signature compared to *DNMT3A*<sup>+/+</sup> CD34<sup>+</sup> HSPCs isolated from the same individuals  
67 (Fig. 1H)<sup>23</sup>. Several TNF $\alpha$  target genes were commonly upregulated in human *DNMT3A*<sup>R882H/+</sup> CD34<sup>+</sup>  
68 HSPCs and mouse *Dnmt3a*<sup>R878H/+</sup> HSCs, including *JUN* and *NFKB2* (Fig. 1I). Taken together, the  
69 selective advantage of mouse and human *DNMT3A*-mutant HSCs correlates with a TNF $\alpha$ -induced,  
70 HSC-survival-associated gene expression signature.

71

72 To assess the extent to which TNF $\alpha$  directly promotes young *Dnmt3a*-mutant HSC survival, we added  
73 recombinant TNF $\alpha$  to mixed cultures of wild-type and *Dnmt3a*-mutant HSCs in media that sustains  
74 HSC self-renewal<sup>24,25</sup> (Fig. 2A). TNF $\alpha$  treatment reduced the number of control but not *Dnmt3a*<sup>R878H/+</sup>  
75 cells produced over the culture period (Supplementary Fig. 2A) and did not alter stem/progenitor cell  
76 surface marker phenotypes (Supplementary Fig. 2B). Post culture, cells were transplanted into recipient  
77 mice to assess HSC function. TNF $\alpha$ -treated control HSCs did not sustain long-term multilineage  
78 engraftment (Fig. 2B and Supplementary Fig. 2C-F). In contrast, TNF $\alpha$ -treated *Dnmt3a*<sup>R878H/+</sup> HSCs  
79 increased production of mature hematopoietic cells in the short term (4 weeks post-transplant) followed  
80 by sustained multilineage engraftment at levels comparable to vehicle-treated *Dnmt3a*<sup>R878H/+</sup> cells. In  
81 addition, TNF $\alpha$  stimulation transiently increased *Dnmt3a*<sup>R878H/+</sup> B lymphoid cell production (Fig. 2C-D  
82 and Supplementary Fig. 2C), in contrast to transient myeloid regeneration from TNF $\alpha$ -treated control

83 HSCs as has been previously reported<sup>20</sup>. In the bone marrow of mice transplanted with TNF $\alpha$ -treated  
84 control HSCs, we observed trends toward reduced HSC, MPP<sup>Mk/E</sup>, and MPP<sup>G/M</sup> populations  
85 (Supplementary Fig. 2G-H). This decrease was not observed in TNF $\alpha$ -treated *Dnmt3a*<sup>R878H/+</sup> HSCs.  
86 Thus, the ability of TNF $\alpha$  to promote myeloid regeneration at the expense of maintaining self-renewal in  
87 control HSCs is disrupted in *Dnmt3a*<sup>R878H/+</sup> HSCs. Instead, TNF $\alpha$ -treated *Dnmt3a*<sup>R878H/+</sup> HSCs favor  
88 lymphoid regeneration and maintain their self-renewal. To assess if our observations were specific to  
89 using *Mx*-Cre recombination and/or the *Dnmt3a*<sup>R878H</sup> mutation, we performed TNF $\alpha$  stimulation of HSCs  
90 from tamoxifen-inducible *Fgd5*-Cre-driven *Dnmt3a*<sup>R878H/+</sup> mice as well as germline *Dnmt3a*<sup>+/-</sup> mice (Fig.  
91 2E). We find that TNF treatment reduced the number of control cells but not *Fgd5*-Cre-driven  
92 *Dnmt3a*<sup>R878H/+</sup> cells (Fig. 2F) or *Dnmt3a*<sup>+/-</sup> cells (Fig. 2G) over the culture period. After transplant into  
93 recipient mice, TNF $\alpha$ -treated *Dnmt3a*<sup>+/-</sup> HSCs vs. control HSCs had increased production of mature  
94 hematopoietic cells in the short term (Fig. 2H) and increased B lymphoid relative to myeloid cell  
95 production (Fig. 2I). Thus, disrupted myeloid regeneration and HSC survival phenotypes induced by  
96 TNF $\alpha$  are broadly relevant to *Dnmt3a*-mutant clonal hematopoiesis.

97

98 TNF $\alpha$  signaling occurs through two distinct TNF $\alpha$  receptors, TNFR1 (*Tnfrsf1a*) and TNFR2 (*Tnfrsf1b*).  
99 Both TNFR1 and TNFR2 are expressed on HSC and MPP populations and are not altered in expression  
100 in *Dnmt3a*<sup>R878H/+</sup> mice (Supplementary Fig. 3A-D). To determine which of these receptors are  
101 responsible for TNF $\alpha$ -mediated selective advantage of *Dnmt3a*<sup>R878H/+</sup> HSCs and B lymphoid cell  
102 production, we crossed *Dnmt3a*<sup>R878H/+</sup> mice with *Tnfrsf1a* or *Tnfrsf1b* knockout mice (Supplementary  
103 Fig. 3E)<sup>26</sup> and rigorously tested HSC function using competitive serial BM transplantation into aged  
104 recipients (Fig. 3A). Loss of TNFR1, but not TNFR2, eliminated the selective advantage of  
105 *Dnmt3a*<sup>R878H/+</sup> PB and BM cells in primary (Supplementary Fig. 4A-B) and secondary (Fig. 3B and  
106 Supplementary Fig. 5A) transplant, including in the HSC compartment itself (Supplementary Fig. 4E-F  
107 and Supplementary Fig. 5E-F). No change in engraftment was observed in TNFR1 knockout-only  
108 controls (Supplementary Fig. 6A-B and Supplementary Fig. 7A, E-G), demonstrating that this is a  
109 specific dependency of *Dnmt3a*<sup>R878H/+</sup> cells. In contrast, loss of TNFR2, but not TNFR1, reduced the  
110 proportion of B and T lymphoid cells and increased the proportion of myeloid cells (Fig. 3C-D and  
111 Supplementary Fig. 4C-D and Supplementary Fig. 5B-D) without altering overall white blood cell  
112 production (Supplementary Fig. 5B). This myeloid-biased hematopoiesis was also observed in TNFR2  
113 knockout-only controls but only late in the post-secondary-transplant period (Supplementary Fig. 6C-D  
114 and Supplementary Fig. 7C-D) and was more mild as it did not increase neutrophil count

115 (Supplementary Fig. 7B), demonstrating that TNFR2 signaling regulates lymphoid cell output from  
116 *Dnmt3a*<sup>R878H/+</sup> cells more so than wild-type cells. Taken together, our results demonstrate that distinct  
117 TNF $\alpha$  receptor signaling controls *Dnmt3a*<sup>R878H/+</sup> HSC self-renewal and regenerative capacity versus  
118 lineage output in response to elevated TNF $\alpha$ . To test if pharmacological blockade of TNF signaling  
119 would recapitulate TNFR knockout phenotypes, we treated competitive secondary transplant mice with  
120 etanercept, a pan-TNF $\alpha$  inhibitor (Fig. 3 E). Etanercept treatment reduced competitive engraftment of  
121 *Dnmt3a*<sup>R878H/+</sup> cells in the PB (Fig. 3F) and trended toward reduction in the BM (Fig. 3G), and reduced  
122 the frequency of *Dnmt3a*<sup>R878H/+</sup> HSC, MPP<sup>Mk/E</sup>, and MPP<sup>Ly</sup> populations at the time of harvest (Fig. 3H). In  
123 contrast, *Dnmt3a*<sup>R878H/+</sup> myeloid-primed multipotent progenitors MPP<sup>G/M</sup> trended toward increase after  
124 etanercept treatment. These results suggest that pan-TNF inhibition results in a mix of our observed  
125 TNFR knockout phenotypes, that is, reduced selective advantage of *Dnmt3a*<sup>R878H/+</sup> hematopoiesis as  
126 well as myeloid lineage bias at the stem/progenitor cell level.

127

128 To interrogate mechanisms by which TNF $\alpha$  signaling through different receptors impacts *Dnmt3a*<sup>R878H/+</sup>  
129 cells, we harvested donor-derived hematopoietic stem and progenitor cells from secondary transplant  
130 recipient mice for single cell RNA-sequencing ( $n = 3-4$  biological replicates per genotype) (Fig. 4A).  
131 After quality control filtering (Supplementary Fig. 8A-C), a total of 64,830 cells clustered into 22  
132 populations (Fig. 4B). These clusters were classified based on published data to identify HSC,  
133 multipotent progenitor, and lineage-specified progenitor<sup>27</sup> (Supplementary Fig. 8D and Supplementary  
134 Table 1). Pseudotime trajectory analysis revealed that myeloid progenitor differentiation from HSCs  
135 (My) followed a distinct path in *Dnmt3a*<sup>R878H/+</sup> vs. control BM (Fig. 4C), whereas erythroid (Ery) and  
136 megakaryocyte (Mk) progenitor differentiation paths were similar. Loss of TNFR1 fully corrected the  
137 aberrant *Dnmt3a*<sup>R878H/+</sup> HSC to myeloid progenitor differentiation trajectory to closely resemble control  
138 BM, while loss of TNFR2 created multiple myeloid differentiation trajectories from *Dnmt3a*<sup>R878H/+</sup> HSCs.  
139 These data are highly consistent with our functional observations that loss of TNFR1 eliminates  
140 *Dnmt3a*<sup>R878H/+</sup> selective advantage and loss of TNFR2 biases toward myeloid cell production. Within the  
141 subsets of hematopoietic stem and progenitor cells that we identified, TNF signaling was most strongly  
142 enriched in *Dnmt3a*<sup>R878H/+</sup> vs. control HSCs (Fig. 4D), supporting that TNF-induced phenotypes are  
143 initiated at the HSC level. Indeed, many downstream TNF targets were increased in expression in  
144 *Dnmt3a*<sup>R878H/+</sup> vs. control HSCs, and several of these target genes are known to be hypomethylated in  
145 *Dnmt3a*<sup>R878H/+</sup> HSCs<sup>28</sup> (Fig. 4E). *Dnmt3a*<sup>R878H/+</sup> TNFR1 knockout HSCs and *Dnmt3a*<sup>R878H/+</sup> TNFR2  
146 knockout HSCs demonstrated downregulation of *Tnfrsf1a* and *Tnfrsf1b* transcripts, respectively.

147 Focusing on unique transcriptional changes in *Dnmt3a*<sup>R878H/+</sup> TNFR1 vs. TNFR2 knockout HSCs, we  
148 found that loss of TNFR1 resulted in increased expression of mediators of apoptosis, initiation factors  
149 for DNA repair and checkpoint activation, increased expression of *Cebpb*, and decreased cell division  
150 (Fig. 4E-F). In contrast, loss of TNFR2 resulted in increased expression of the apoptosis inhibitor *Birc2*,  
151 decrease in tumor suppressor p53, dysregulation of chromatin organization and decreased B and T  
152 lymphoid ‘adaptive immune’ signatures. Together, our work supports that TNF $\alpha$ -TNFR1 signaling  
153 promotes *Dnmt3a*<sup>R878H/+</sup> HSC competitive advantage through evasion of apoptosis, accumulation of  
154 DNA damage, self-renewal, and cell cycling. In contrast, TNF $\alpha$ -TNFR2 signaling promotes lymphoid  
155 cell production from *Dnmt3a*<sup>R878H/+</sup> HSCs, and restrains myeloid cell production, through chromatin  
156 regulation and expression of lymphoid-specifying genes.

157

### 158 **Discussion:**

159 Inhibition of pro-inflammatory cytokines, including TNF $\alpha$ , has been proposed as a generalizable  
160 strategy to reduce fitness of CH-mutant HSCs and risk of CH-associated disease states as these are  
161 related to abnormal production of pro-inflammatory myeloid cell types<sup>7,29-32</sup>. Our work suggests that  
162 pan-TNF inhibition can reduce *Dnmt3a*<sup>R878H/+</sup> HSC fitness but also results in more complex and  
163 potentially detrimental effects due to unrestrained *Dnmt3a*<sup>R878H/+</sup> myeloid cell production. Alternatively,  
164 we have found that programs dictating *Dnmt3a*-mutant HSC fitness and mature hematopoietic lineage  
165 cell production can be separated by downstream pathway dissection of TNF $\alpha$  signaling. Our work  
166 supports the possibility of independently regulating clone fitness and lineage output to reduce risk of  
167 CH-associated diseases such as hematologic malignancy and harness potential beneficial aspects of CH  
168 such as maintained T-cell function in aging, survival of stem cell transplant recipients, and reduced risk  
169 of Alzheimer’s disease.



170 **Materials and Methods:**

171 **Experimental Animals**

172 C57BL/6J (stock #00664, referred to as “CD45.2<sup>+</sup>”) and B6.SJL-Ptprca Pepcb /BoyJ (stock #002014,  
173 referred to as “CD45.1<sup>+</sup>”) mice were obtained from, and aged within, The Jackson Laboratory (JAX).  
174 *Dnmt3a*<sup>fl-R878H/+</sup> mice<sup>12</sup> were crossed to B6.CgTg(Mx1-cre)1Cgn/J mice (referred to as Mx-Cre)<sup>33</sup>.  
175 B6.129S-*Tnfrsf1b*<sup>tm1/mx</sup>; *Tnfrsf1a*<sup>tm1/mx</sup> <sup>26</sup> were obtained from JAX (stock #003243) and crossed to  
176 *Dnmt3a*<sup>fl-R878H/+</sup>;Mx-Cre. The Jackson Laboratory’s Institutional Animal Care and Use Committee  
177 (IACUC) approved all experiments.

178

179 **Flow Cytometry and Cell Sorting**

180 Single cell suspensions of BM were prepared by filtering crushed, pooled femurs, tibiae, and iliac crests  
181 from each mouse. BM mononuclear cells (MNCs) were isolated by Ficoll-Paque (GE Healthcare Life  
182 Sciences) density centrifugation and stained with a combination of fluorochrome-conjugated antibodies  
183 from eBioscience, BD Biosciences, or BioLegend: CD45.1 (clone A20), CD45.2 (clone 104), c-Kit  
184 (clone 2B8), Sca-1 (clone 108129), CD150 (clone TC15-12F12.2), CD48 (clone HM48-1), FLT3 (Clone  
185 A2F10), CD34 (clone RAM34), FcgR (clone 2.4G2), mature lineage (Lin) marker mix and a viability  
186 stain. Stained cells were sorted using a FACS Aria or a FACSymphony S6 Sorter (BD Biosciences), or  
187 analyzed on a FACSymphony A5 or LSR II with Diva software (BD Biosciences) based on the  
188 following surface marker profiles: HSC (Lin- Sca-1+ c-Kit+ Flt3- CD150+ CD48-), MPP (Lin- Sca-1+  
189 c-Kit+ Flt3- CD150- CD48-), MPP<sup>Mk/E</sup> (Lin- Sca-1+ c-Kit+ Flt3- CD150+ CD48+), MPP<sup>G/M</sup> (Lin- Sca-  
190 1+ c-Kit+ Flt3- CD150- CD48+), MPP<sup>Ly</sup> (Lin- Sca-1+ c-Kit+ Flt3+), HSC+MPP (Lin- Sca-1+ c-Kit+),  
191 and MyPro (Lin- Sca-1- c-Kit+). TNFR1 staining used a tertiary staining method using purified anti-  
192 mouse TNFR1 (Biolegend cat. #113001) followed by biotin goat-anti-hamster IgG (Biolegend cat  
193 #405501) followed by streptavidin-PE (BD cat. #554061). TNFR2 staining used a secondary staining  
194 approach using anti-mouse TNFR2 (Biolegend cat no. 113403) followed by streptavidin-PE. PB samples  
195 were stained and analyzed using a cocktail of CD45.1, CD45.2, CD11b (clone M1/70), B220 (clone  
196 RA3-6B2), CD3e (clone 145-2C11), Ly6g (clone 1A8), and Ly6c (clone HK1.4) on an LSR II (BD)  
197 based on the following surface marker profiles: B cells (B220+ CD11b- CD3e-), T cells (CD3e+ B220-  
198 CD11b-), myeloid cells (CD11b+ B220- CD3-), granulocytes (CD11b+ B220- CD3- Ly6g+ Ly6c+),  
199 monocytes (CD11b+ B220- CD3- Ly6g- Ly6c+), macrophages (CD11b+ B220- CD3- Ly6g- Ly6c-).  
200 Gating analysis was performed using FlowJo software v10.

201

202 **Transplants into Young and Aged Recipient Mice**



203 2–4-month-old *Dnmt3a*<sup>+/+</sup> Mx-Cre or *Dnmt3a*<sup>fl-R878H/+</sup> Mx-Cre donors were injected with poly(I:C). 2  
204 months post-poly(I:C), 2 x 10<sup>6</sup> post-ficoll whole bone marrow cells from the donors were transplanted  
205 into lethally irradiated (10 Gy) young (2-4 mos) or middle-aged (13-15 mos) CD45.1<sup>+</sup> recipient mice.  
206 All transplant recipient mice were monitored every 4 weeks post-transplant by flow cytometry analysis  
207 of PB and were harvested for bone marrow analysis at 40 weeks post-transplant.

208

### 209 **Polyvinyl Alcohol (PVA) Culture and Transplants**

210 2-month-old *Dnmt3a*<sup>+/+</sup> Mx-Cre or *Dnmt3a*<sup>fl-R878H/+</sup> Mx-Cre donors (CD45.2<sup>+</sup>) were injected with  
211 5mg/kg poly(I:C) every other day for a total of five injections. 2 months post-poly(I:C), 25 CD45.2<sup>+</sup> and  
212 25 CD45.1<sup>+</sup>/CD45.2<sup>+</sup> HSCs were sorted into a 96-well plate with Ham's F12 media containing final  
213 concentrations of 1x Penicillin–streptomycin–glutamine (Gibco cat. # 10378-016), 10 mM HEPES  
214 (Gibco cat. #15630080), 1x Insulin–transferrin–selenium–ethanolamine (Gibco cat. #51500-056), 100  
215 ng/mL recombinant murine TPO (Biolegend cat. # 593302), 10 ng/mL recombinant murine SCF  
216 (StemCell Technologies cat. # 78064), and 1 mg/mL polyvinyl alcohol (Sigma cat. # P8136)<sup>24,25</sup> +/- 10  
217 ng/mL recombinant murine TNF- $\alpha$  (PeproTech cat. #315-01A) and cultured for seven days at 37°C and  
218 5% CO<sub>2</sub>. TNF- $\alpha$  was spiked into the cultures on day 4 and 6. On day 7, half of the wells were stained  
219 and analyzed by flow cytometry and half of the wells were harvested, mixed with 1 x 10<sup>6</sup> CD45.1<sup>+</sup> post-  
220 ficoll whole BM cells, and transplanted into young, lethally irradiated CD45.1<sup>+</sup> recipients. PB was  
221 tracked monthly for 6 months post-transplant via flow cytometry.

222

### 223 **Etanercept Transplants**

224 1x10<sup>6</sup> BM cells from 2–4-month-old *Dnmt3a*<sup>+/+</sup> Mx-Cre or *Dnmt3a*<sup>fl-R878H/+</sup> MxCre donors were  
225 competitively transplanted with wild-type CD45.1<sup>+</sup> CD45.2<sup>+</sup> F1 BM cells in 2-4 month old CD45.1<sup>+</sup>  
226 lethally irradiated recipients. Recipients were allowed to recover for one month and then poly(I:C) was  
227 administered every other day for a total of five injections to induce Cre expression. 28 weeks post-  
228 poly(I:C), bone marrow was harvested and 5 x 10<sup>6</sup> whole bone marrow cells were transplanted into 2–4-  
229 month-old lethally irradiated CD45.1<sup>+</sup> recipients. 24 weeks post-secondary transplant, etanercept (25  
230 mg/kg, Millipore Sigma #Y0001969) or PBS was administered via IP twice per week for four weeks. PB  
231 was monitored weekly and at 28 weeks post-transplant, bone marrow was harvested for analysis.

232

### 233 **TNFR Knockout Transplants**

234 1x10<sup>6</sup> CD45.2<sup>+</sup> cells were competed against 1x10<sup>6</sup> CD45.1<sup>+</sup> whole BM cells and transplanted into aged,  
235 lethally irradiated CD45.1<sup>+</sup> recipient animals. One-month post-transplant, recipients received one IP

236 injection of poly(I:C) and recombination was checked via PCR on PB. One month post poly(I:C),  
237 animals were bled monthly for 16 weeks. Bone marrow was harvested and  $4 \times 10^6$  whole BM cells were  
238 used for secondary transplantation into aged, lethally irradiated recipients. PB was analyzed starting at  
239 one-month post-transplant and continued monthly for 20 weeks. BM was harvested and analyzed by  
240 flow cytometry and Lin- c-kit<sup>+</sup> CD45.2<sup>+</sup> cells were FACS-sorted for single-cell RNA-sequencing.  
241 Complete blood counts (CBC) were performed on a Advia 120 Hematology Analyzer (Siemens).

242

### 243 **Bulk RNA-Sequencing and Analysis**

244 2–4-month-old *Dnmt3a*<sup>+/+</sup> Mx-Cre or *Dnmt3a*<sup>R878H/+</sup> Mx-Cre donors were injected with poly(I:C) five  
245 times every other day. 1-month post-poly(I:C),  $1 \times 10^6$  whole BM cells from were transplanted into  
246 sublethally irradiated (6 Gy) young (2mos) or middle-aged (13-15 mos) CD45.1<sup>+</sup> recipient mice.  
247 Recipients were harvested at 4 mos post-transplant for PB and BM analysis. CD45.2<sup>+</sup> HSCs were sorted  
248 directly into RLT buffer (Qiagen) and flash frozen. Total RNA was isolated using the RNAeasy Micro  
249 Kit (Qiagen) including DNase treatment, and sample quality was assessed using a Nanodrop 2000  
250 spectrophotometer (Thermo Scientific) and RNA 6000 Pico LabChip assay (Agilent Technologies).  
251 Libraries were prepared using the Ovation RNA-seq System V2 (NuGen) and Hyper Prep Kit (Kapa  
252 Biosystems). Library quality and concentration evaluated using D5000 ScreenTape assay (Agilent) and  
253 quantitative PCR (Kapa Biosystems). Libraries were pooled and sequenced 75bp single end on the  
254 NextSeq (Illumina) using NextSeq High Output Kit v2 reagents at a sequencing depth of >30 million  
255 reads per sample. Trimmed alignment files were processed using RSEM (v1.2.12). Alignment was  
256 completed using Bowtie 2 (v2.2.0). Expected read counts per gene produced by RSEM were rounded to  
257 integer values, filtered to include only genes that have at least two samples within a sample group  
258 having a cpm > 1, and were passed to edgeR (v3.14.0) for differential expression analysis. The GLM  
259 likelihood ratio test was used for differential expression in pairwise comparisons between sample groups  
260 which produced exact p-values per test. The Benjamini and Hochberg's algorithm (p-value adjustment)  
261 was used to control the false discovery rate (FDR). Features with FDR-adjusted p-value < 0.05 were  
262 declared significantly differentially expressed. Differentially expressed genes were investigated for  
263 overlap with published datasets using Gene Set Enrichment Analysis (GSEA) and upstream regulators  
264 were predicted using Ingenuity Pathway Analysis (IPA) software (Qiagen).

265

### 266 **Single Cell RNA Sequencing and Analysis**

267 Cells were counted on a Countess II automated cell counter (ThermoFisher) and 12,000 cells were  
268 loaded on to one lane of a 10X Chromium microfluidic chip. (10X Genomics). Single cell capture,

269 barcoding and library preparation were performed using the 10X Chromium version 3.1 chemistry,  
270 according to the manufacturer's protocol (#CG000315). cDNA and libraries were checked for quality on  
271 Agilent 4200 TapeStation and quantified by KAPA qPCR before sequencing; each gene expression  
272 library was sequenced at 18.75% of an Illumina NovaSeq 6000 S4 flow cell lane, targeting 6,000  
273 barcoded cells with an average sequencing depth of 75,000 reads per cell. Illumina base call files for all  
274 libraries were demultiplexed and converted to FASTQs using bcl2fastq v2.20.0.422 (Illumina). The  
275 Cellranger pipeline (10x Genomics, version 6.0.0) was used to align reads to the mouse reference  
276 GRCm38.p93 (mm10 10x Genomics reference 2020-A), de-duplicate reads, call cells, and generate cell  
277 by gene digital counts matrices for each library. The resultant counts matrices were uploaded into  
278 PartekFlow (version 10.0.22.0428) for downstream analysis and visualization. This included log  
279 transformation of count data, principal component analysis, graph-based clustering from the top 20  
280 principal components using the Louvain Algorithm, UMAP visualization, and pathway enrichment  
281 analysis. Trajectory and pseudotime analysis were performed using Monocle 3.

282

### 283 **Statistical Analysis**

284 No sample group randomization or blinding was performed. All statistical tests, including evaluation of  
285 normal distribution of data and examination of variance between groups being statistically compared,  
286 were assessed using Prism 9 software (GraphPad).

287

### 288 **Data Availability Statement**

289 All data in this study are deposited in the NCBI Gene Expression Omnibus (GEO) under accession  
290 number GSE189406 (bulk RNA-seq) and GSE203550 (single-cell RNA-seq).

291

292

### 293 **Acknowledgements:**

294 We thank all members of the Trowbridge lab for their help with experimental support and manuscript  
295 editing. We thank Ross Levine, Coleman Lindsley, and Michael Rauh for discussions and input, and  
296 Dan Landau and Neville Dusaj for providing single cell expression data from human *DNMT3A*-mutant  
297 CH samples. We thank the Scientific Research Services at The Jackson Laboratory, specifically the  
298 Single Cell Biology service, Histopathology-Clinical Chemistry, Genome Technologies, Computational  
299 Sciences, and Flow Cytometry. These shared services are supported in part by the JAX Cancer Center  
300 (P30 CA034196).

301

## References:

1. Kim, P. G. *et al.* Dnmt3a -mutated clonal hematopoiesis promotes osteoporosis. *J. Exp. Med.* **218**, (2021).
2. Genovese, G. *et al.* Clonal Hematopoiesis and Blood-Cancer Risk Inferred from Blood DNA Sequence. *N. Engl. J. Med.* **371**, 2477–2487 (2014).
3. Jaiswal, S. *et al.* Age-related clonal hematopoiesis associated with adverse outcomes. *N. Engl. J. Med.* **371**, 2488–2498 (2014).
4. Leoni, C. *et al.* Dnmt3a restrains mast cell inflammatory responses. *Proc. Natl. Acad. Sci. U. S. A.* **114**, E1490–E1499 (2017).
5. Cull, A. H., Snetsinger, B., Buckstein, R., Wells, R. A. & Rauh, M. J. Tet2 restrains inflammatory gene expression in macrophages. *Exp. Hematol.* **55**, 56-70.e13 (2017).
6. Jaiswal, S. *et al.* Clonal Hematopoiesis and Risk of Atherosclerotic Cardiovascular Disease. *N. Engl. J. Med.* **377**, 111–121 (2017).
7. Fuster, J. J. *et al.* TET2-Loss-of-Function-Driven Clonal Hematopoiesis Exacerbates Experimental Insulin Resistance in Aging and Obesity. *Cell Rep.* **33**, (2020).
8. van den Akker, E. B. *et al.* Uncompromised 10-year survival of oldest old carrying somatic mutations in DNMT3A and TET2. *Blood* **127**, 1512–1515 (2016).
9. Bouzid, H. *et al.* Clonal Hematopoiesis is Associated with Reduced Risk of Alzheimer’s Disease. *Blood* **138**, 5 (2021).
10. Gibson, C. J. *et al.* Donor Clonal Hematopoiesis and Recipient Outcomes After Transplantation. *J. Clin. Oncol.* (2021) doi:10.1200/JCO.21.02286.
11. van den Akker, E. B. *et al.* Dynamic clonal hematopoiesis and functional T-cell immunity in a supercentenarian. *Leukemia* **35**, 2125–2129 (2021).
12. Loberg, M. A. *et al.* Sequentially inducible mouse models reveal that Npm1 mutation causes malignant transformation of Dnmt3a-mutant clonal hematopoiesis. *Leukemia* (2019) doi:10.1038/s41375-018-0368-6.
13. Young, K. *et al.* Decline in IGF1 in the bone marrow microenvironment initiates hematopoietic stem cell aging. *Cell Stem Cell* **28**, 1473-1482.e7 (2021).
14. Linton, P. J. & Dorshkind, K. Age-related changes in lymphocyte development and function. *Nat. Immunol.* **5**, 133–139 (2004).
15. Slayton, W. B. *et al.* The Role of the Donor in the Repair of the Marrow Vascular Niche Following Hematopoietic Stem Cell Transplant. *Stem Cells* **25**, 2945–2955 (2007).
16. Cao, X. *et al.* Irradiation induces bone injury by damaging bone marrow microenvironment for stem cells. *Proc. Natl. Acad. Sci. U. S. A.* **108**, 1609–1614 (2011).
17. Green, D. E. & Rubin, C. T. Consequences of irradiation on bone and marrow phenotypes, and its relation to disruption of hematopoietic precursors. *Bone* **63**, 87–94 (2014).
18. Li, J., Kwong, D. L. W. & Chan, G. C. F. The effects of various irradiation doses on the growth and differentiation of marrow-derived human mesenchymal stromal cells. *Pediatr. Transplant.* **11**, 379–387 (2007).
19. Abbuehl, J. P., Tatarova, Z., Held, W. & Huelsken, J. Long-Term Engraftment of Primary Bone Marrow Stromal Cells Repairs Niche Damage and Improves Hematopoietic Stem Cell Transplantation. *Cell Stem Cell* **21**, 241-255.e6 (2017).
20. Yamashita, M. & Passegué, E. TNF- $\alpha$  Coordinates Hematopoietic Stem Cell Survival and Myeloid Regeneration. *Cell Stem Cell* **25**, 357-372.e7 (2019).
21. Ivanova, N. B. *et al.* A stem cell molecular signature. *Science* **298**, 601–604 (2002).
22. Eppert, K. *et al.* Stem cell gene expression programs influence clinical outcome in human leukemia. *Nat. Med.* **17**, 1086–1094 (2011).
23. Nam, A. S. *et al.* Single-cell multi-omics of human clonal hematopoiesis reveals that DNMT3A

- R882 mutations perturb early progenitor states through selective hypomethylation. *bioRxiv* **136**, 2022.01.14.476225 (2022).
24. Wilkinson, A. C. *et al.* Long-term ex vivo haematopoietic-stem-cell expansion allows nonconditioned transplantation. *Nature* **571**, 117–121 (2019).
  25. Wilkinson, A. C., Ishida, R., Nakauchi, H. & Yamazaki, S. Long-term ex vivo expansion of mouse hematopoietic stem cells. *Nat. Protoc.* **15**, 628–648 (2020).
  26. Peschon, J. J. *et al.* TNF receptor-deficient mice reveal divergent roles for p55 and p75 in several models of inflammation. *J. Immunol.* **160**, 943–52 (1998).
  27. Giladi, A. *et al.* Single-cell characterization of haematopoietic progenitors and their trajectories in homeostasis and perturbed haematopoiesis. *Nat. Cell Biol.* **20**, 836–846 (2018).
  28. Jeong, M. *et al.* Loss of Dnmt3a Immortalizes Hematopoietic Stem Cells In Vivo. *Cell Rep.* **23**, 1–10 (2018).
  29. Cai, Z. *et al.* Inhibition of Inflammatory Signaling in Tet2 Mutant Preleukemic Cells Mitigates Stress-Induced Abnormalities and Clonal Hematopoiesis. *Cell Stem Cell* **23**, 833-849.e5 (2018).
  30. Meisel, M. *et al.* Microbial signals drive pre-leukaemic myeloproliferation in a Tet2-deficient host. *Nature* **557**, 580–584 (2018).
  31. Abegunde, S. O., Buckstein, R., Wells, R. A. & Rauh, M. J. An inflammatory environment containing TNF $\alpha$  favors Tet2-mutant clonal hematopoiesis. *Exp. Hematol.* **59**, 60–65 (2018).
  32. Cook, E. K., Luo, M. & Rauh, M. J. Clonal hematopoiesis and inflammation: Partners in leukemogenesis and comorbidity. *Exp. Hematol.* **83**, 85–94 (2020).
  33. Kühn, R., Schwenk, F., Aguet, M. & Rajewsky, K. Inducible gene targeting in mice. *Science* (80-. ). **269**, 1427–1429 (1995).



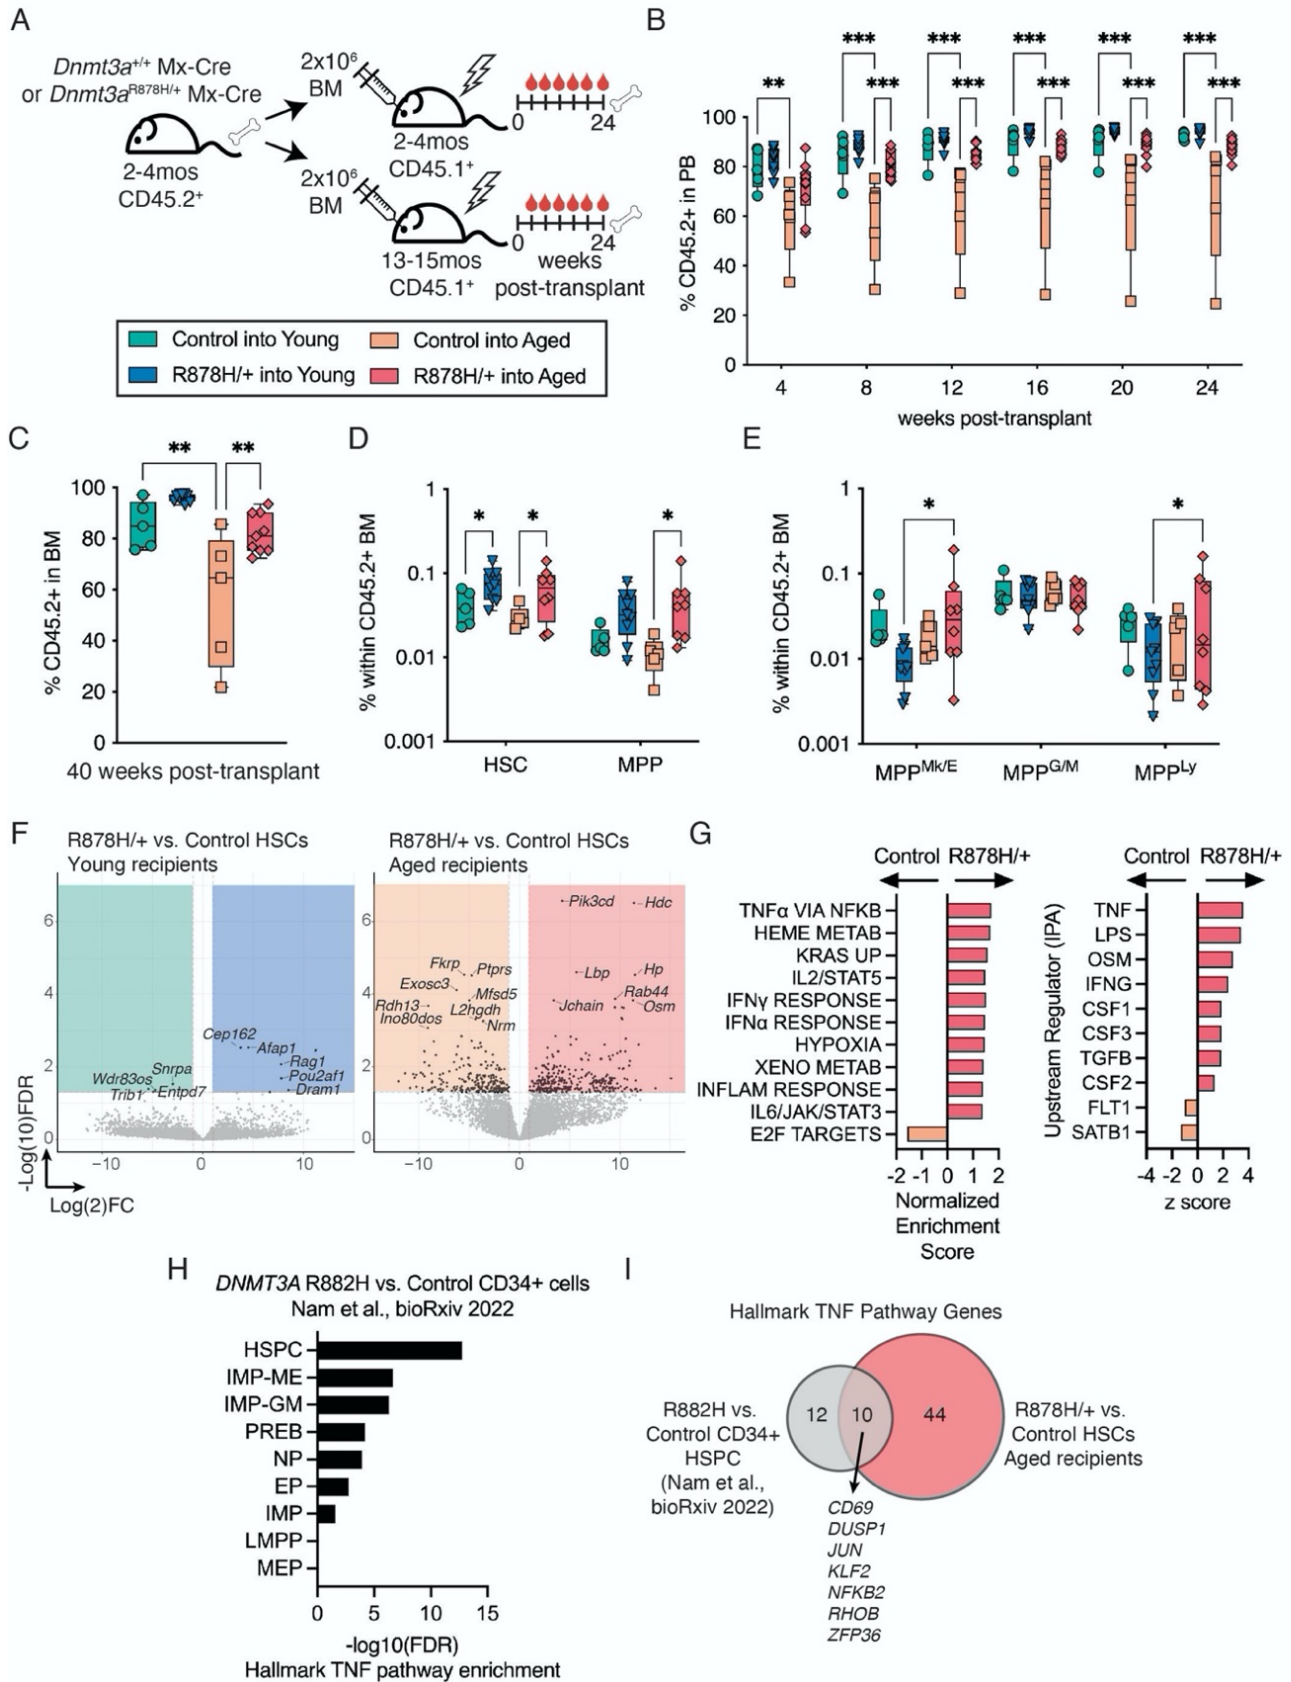

**Figure 1. *Dnmt3a*<sup>R878H/+</sup> HSCs Engage a TNF $\alpha$ -Induced Program in the Aged BM**

**Microenvironment that is Conserved in Human *DNMT3A*-Mutant Clonal Hematopoiesis. (A)**

Schematic of experimental design to compare Mx-Cre control and *Dnmt3a*<sup>R878H/+</sup> (R878H/+) engraftment in young (2-4mo) and aged (13-15mo) recipient mice. (B) Frequency of donor (CD45.2<sup>+</sup>) cells in peripheral blood (PB) of recipient mice post-transplant. Significance calculated using two-way ANOVA with Tukey's multiple comparisons test. (C) Frequency of donor cells in bone marrow (BM) of recipient mice. Significance calculated using one-way ANOVA with Bonferroni's multiple comparisons test. (D) Frequency of HSCs and MPPs in donor-derived BM cells. Significance calculated using two-way ANOVA with Fisher's LSD. (E) Frequency of MPP<sup>Mk/E</sup>, MPP<sup>G/M</sup> and MPP<sup>Ly</sup> in donor-derived BM cells. Significance calculated using two-way ANOVA with Fisher's LSD. (F) Volcano plots with significantly differentially expressed genes (FDR < 0.5, logFC > 2) within colored boxes ( $n = 2-4$  biological replicates). (G) Enrichment of hallmark gene sets (left panel) and predicted upstream regulators (right panel) in control vs. *Dnmt3a*<sup>R878H/+</sup> HSCs in aged recipient mice. (H) Hallmark TNF pathway enrichment across stem and progenitor populations between human *DNMT3A*R882H vs control CD34<sup>+</sup> cells. (I) Overlap of differentially expressed genes in *DNMT3A*R882H vs control CD34<sup>+</sup> cells and R878H/+ vs aged mouse HSCs. (B-E) Dots represent individual recipient mice, boxes show 25 to 75<sup>th</sup> percentile, line is median, whiskers show min to max. \* $P < 0.05$ , \*\* $P < 0.01$ , \*\*\* $P < 0.001$ .



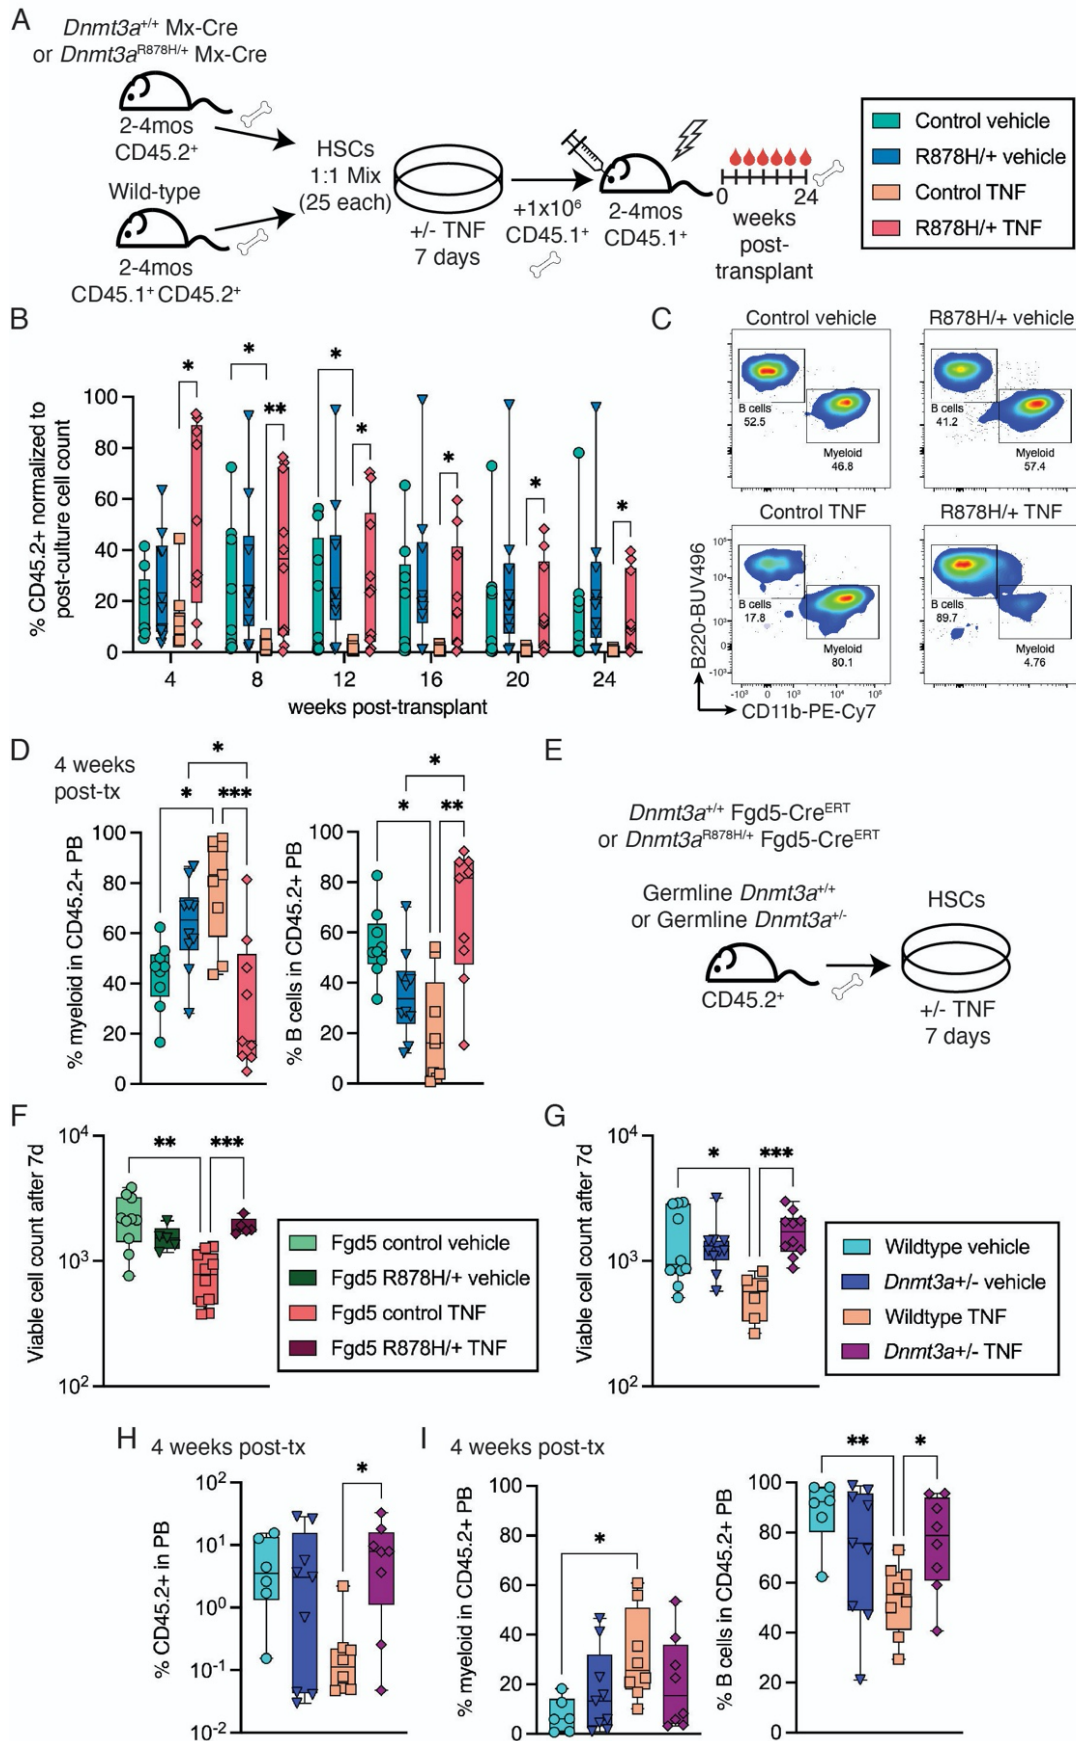

## Figure 2. *Dnmt3a*-Mutant HSCs Maintain Self-Renewal and Generate B Lymphoid Cells

**Following TNF Stimulation.** (A) Schematic of experimental design to test response of Mx-Cre control and *Dnmt3a*<sup>R878H/+</sup> (R878H/+) HSCs to recombinant TNF $\alpha$  *ex vivo* under growth conditions that favor HSC expansion. (B) Normalized frequency of donor-derived cells in PB of recipient mice post-transplant. Significance calculated using mixed-effects model with Fisher's LSD. (C) Representative flow cytometry plots showing B cell and myeloid cell frequencies in donor derived PB at 4 weeks post-transplant. (D) Frequency of myeloid (left) and B cells (right) in donor derived PB at 4 weeks post-transplant. Significance calculated using two-way ANOVA with Sidak's multiple comparison's test (E) Schematic of experimental design to test TNF $\alpha$  response of Fgd5-Cre<sup>ERT</sup> control vs. Fgd5-Cre<sup>ERT</sup> *Dnmt3a*<sup>R878H/+</sup> (R878H/+) HSCs, and germline *Dnmt3a*<sup>+/+</sup> vs. *Dnmt3a*<sup>+/-</sup> HSCs. (F, G) Viable cell counts after 7 days of culture. Significance calculated using Brown-Forsythe and Welch ANOVA with Welch's correction. (H) Frequency of donor-derived cells in PB of recipient mice at 4 weeks post-transplant. Significance calculated using one-way ANOVA with Fisher's LSD. (I) Frequency of myeloid (left) and B cells (right) in donor derived PB at 4 weeks post-transplant. Significance calculated using one-way ANOVA with Fisher's LSD. (B, D, F-I) Dots represent individual recipient mice, boxes show 25 to 75<sup>th</sup> percentile, line is median, whiskers show min to max whiskers show min to max. \* $P < 0.05$ , \*\* $P < 0.01$ , \*\*\* $P < 0.001$ .

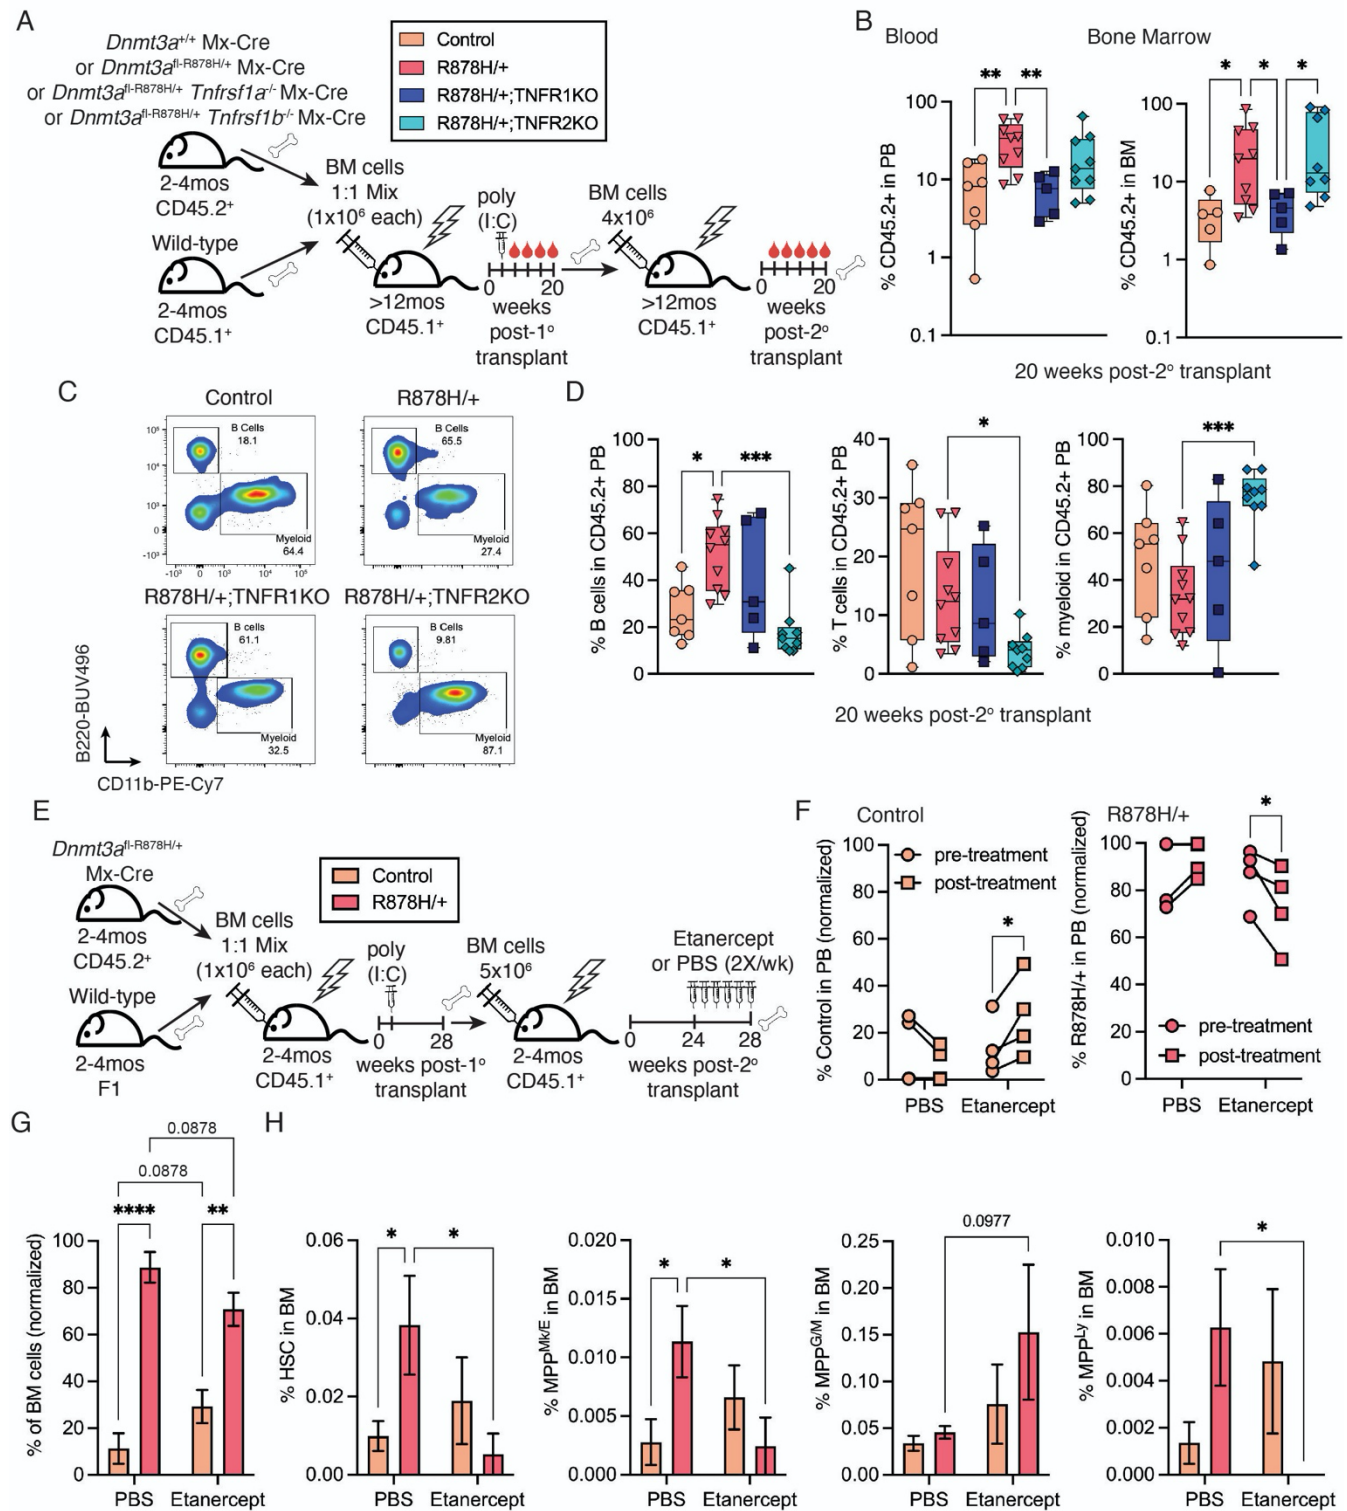

**Figure 3. TNFR1 is Required for *Dnmt3a*<sup>R878H/+</sup> HSC Self-Renewal While TNFR2 Regulates Lymphoid Cell Production.** (A) Schematic of experimental design to test competitive, serial transplant of Mx-Cre control, *Dnmt3a*<sup>R878H/+</sup> (R878H/+), *Dnmt3a*<sup>R878H/+</sup> *Tnfrsf1a*<sup>-/-</sup> (R878H/+;TNFR1KO) and *Dnmt3a*<sup>R878H/+</sup> *Tnfrsf1b*<sup>-/-</sup> (R878H/+;TNFR2KO) in aged (>12mo) recipient mice. (B) Frequency of donor

cells in PB (left) and BM (right) of recipient mice at 20 weeks post-secondary transplant. Significance was calculated using Brown-Forsythe and Welch ANOVA with Welch's correction. **(C)** Representative flow cytometry plots showing B cell and myeloid cell frequencies in donor derived PB. **(D)** Frequency of B cells (left), T cells (center) and myeloid cells (right) in donor derived PB at 20 weeks post-secondary transplant. Significance was calculated using one-way ANOVA with Tukey's multiple comparisons test. **(E)** Experimental schematic of transplant experiment with etanercept treatment. **(F)** Frequency of control or R878H/+ donor cells in PB pre-and post-etanercept treatment. Significance was calculated using two-way ANOVA with Fisher's LSD. **(G)** Frequency of control or R878H/+ donor cells in BM post-etanercept or vehicle treatment. Significance was calculated using two-way ANOVA with Fisher's LSD. **(H)** Frequency of HSC, MPP<sup>Mk/E</sup>, MPP<sup>G/M</sup>, and MPP<sup>Ly</sup> populations in control or R878H/+ BM. Significance was calculated using two-way ANOVA with Fisher's LSD. **(B, D)** Dots represent individual recipient mice, boxes show 25 to 75<sup>th</sup> percentile, line is median, whiskers show min to max. **(F)** Dots represent mean across biological replicates ( $n = 4$ ). **(G, H)** Bars represent mean  $\pm$  SEM ( $n = 4$ ). \* $P < 0.05$ , \*\* $P < 0.01$ , \*\*\* $P < 0.001$ , \*\*\*\* $P < 0.0001$ .



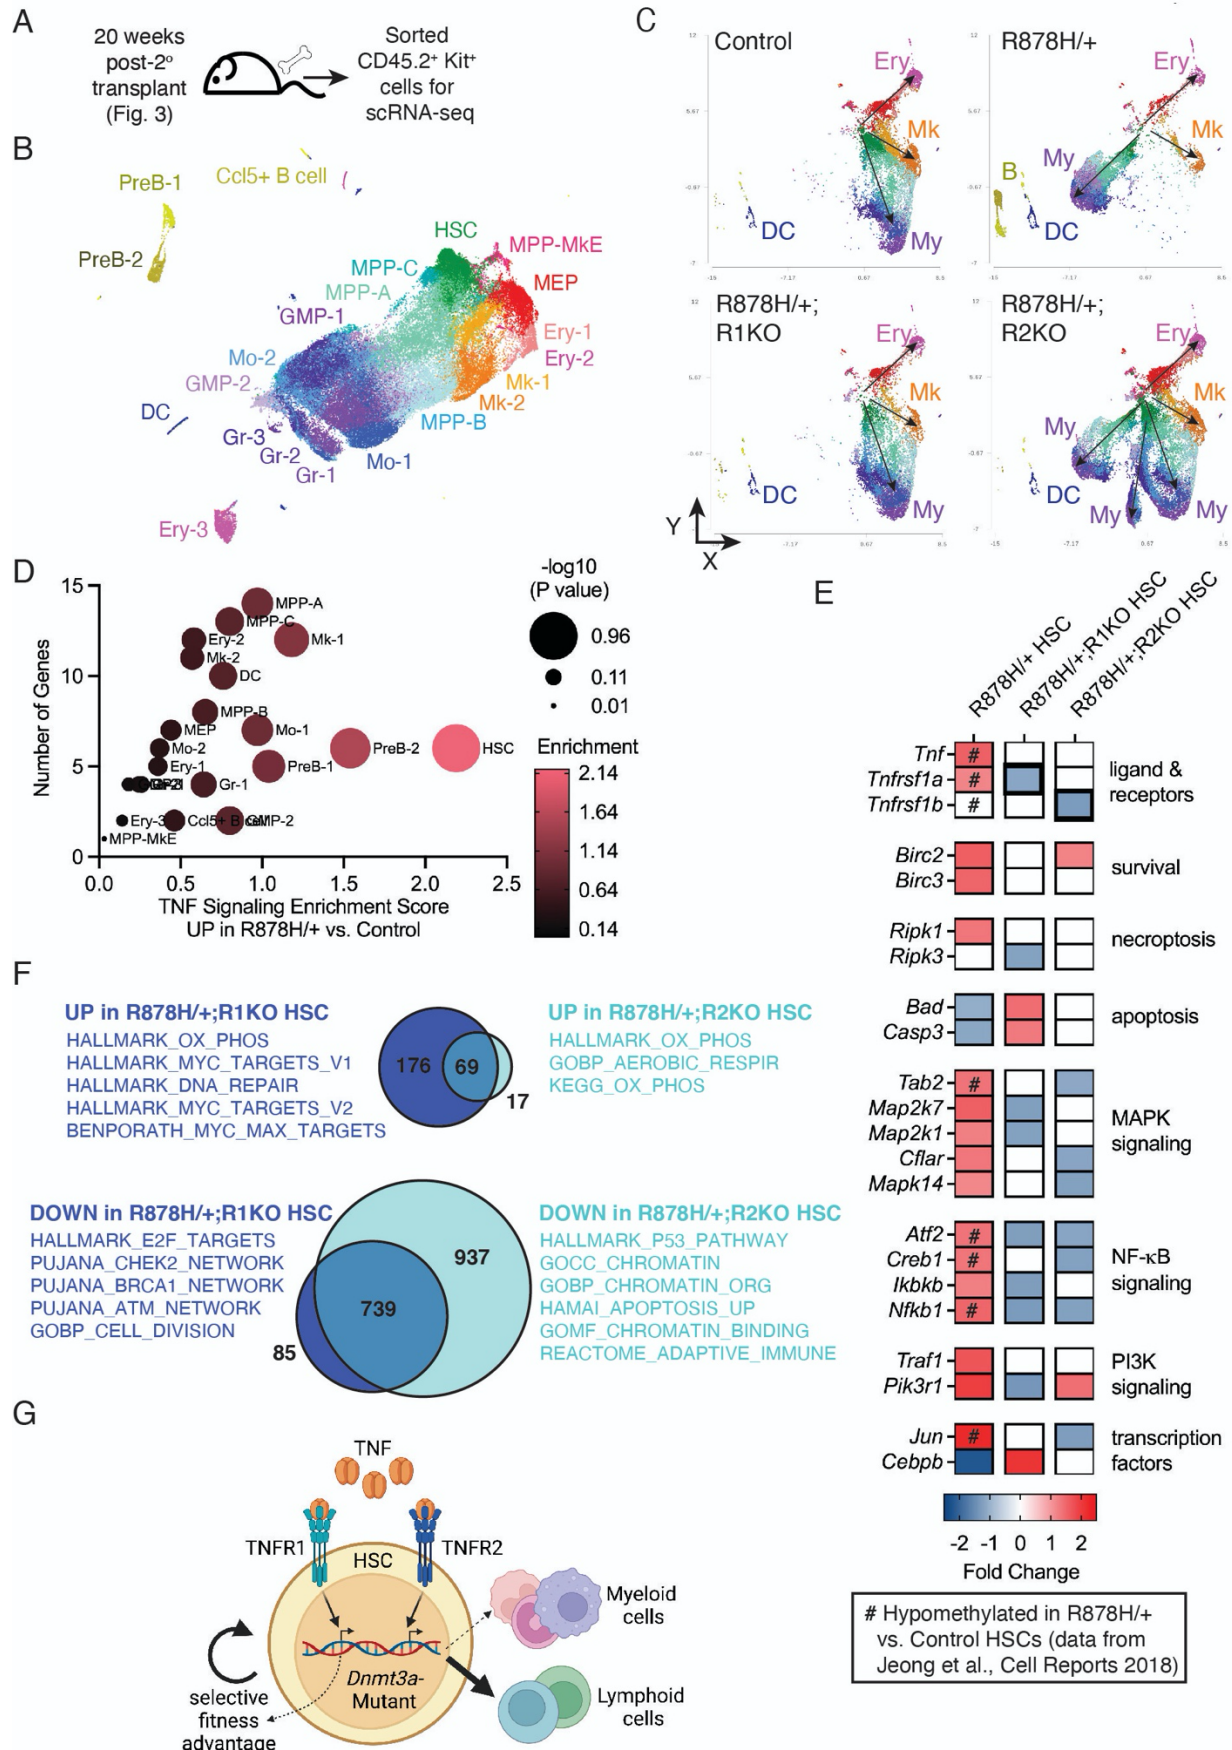

**Figure 4. TNFR1 and TNFR2 Engage Distinct Transcriptional Programs in *Dnmt3a*<sup>R878H/+</sup> HSCs.**

(A) Experimental schematic for single cell (sc) RNA-seq. Data was collected from independent biological replicates of Mx-Cre control ( $n = 3$ ), *Dnmt3a*<sup>R878H/+</sup> (R878H/+) ( $n = 4$ ), *Dnmt3a*<sup>R878H/+</sup> *Tnfrsf1a*<sup>-/-</sup> (R878H/+;R1KO) ( $n = 3$ ) and *Dnmt3a*<sup>R878H/+</sup> *Tnfrsf1b*<sup>-/-</sup> (R878H/+;R2KO) ( $n = 4$ ). (B) UMAP projection of combined data identifying 22 cell clusters. (C) Pseudotime visualization showing predicted differentiation trajectories from HSCs to erythroid (Ery), megakaryocyte (Mk), myeloid (My), B cell (B) and dendritic cell (DC) lineages in each genotype pool. (D) TNF signaling enrichment score in R878H/+ vs. control cell clusters. (E) Heatmap representing fold change in expression of *Tnf*, *Tnfrsf1a* (TNFR1), *Tnfrsf1b* (TNFR2), and downstream TNF-regulated genes comparing R878H/+ vs. control HSCs, R878H/+;R1KO vs. R878H/+ HSCs, and R878H/+;R2KO vs. R878H/+ HSCs. “#” indicate loci hypomethylated in R878H/+ vs. control HSCs<sup>28</sup>. (F) Venn diagrams of overlap between upregulated genes (top) and downregulated genes (bottom) in R878H/+;R1KO and R878H/+;R2KO HSCs compared to R878H/+ HSCs. From each comparison, unique gene lists were used to determine gene signature enrichment. (G) Working model created with BioRender.com. TNF $\alpha$ -TNFR1 signaling dictates *Dnmt3a*-mutant HSC self-renewal whereas TNF $\alpha$ -TNFR2 signaling promotes lymphoid lineage cell production. Decline in TNF $\alpha$ -TNFR2 signaling results in unrestrained production of *Dnmt3a*-mutant myeloid cells.
